# Supplementary material
Source: PubMed Central journal article supplement (PMC5710219)
Supplement: jamapsychiatry-74-1136-s001.pdf [file jamapsychiatry-74-1136-s001.pdf]

## Supplementary Online Content

Bromet EJ, Nock MK, Saha S, et al; the World Health Organization World Mental Health Survey Collaborators. Association between psychotic experiences and subsequent suicidal thoughts and behaviors: a cross-national analysis from the World Health Organization World Mental Health Surveys. *JAMA Psychiatry*. Published online August 30, 2017. doi:10.1001/jamapsychiatry.2017.2647

**eMethods.** Supplementary methods

**eTable 1.** World Mental Health (WMH) sample characteristics by World Bank income categories and sample for psychotic experiences (PEs)

**eTable 2.** Ethics review and informed consent in the World Mental Health Surveys

**eTable 3.** Composite International Diagnostic Interview psychotic experience types in European Study of the Epidemiology of Mental Disorders sites, other sites, and *DSM-IV* mental disorder categories across sites

**eTable 4.** Lifetime prevalence of suicidal plans and attempts among those with suicidal ideation

**eTable 5.** Associations between psychotic experiences and subsequent onset of suicidal plans and attempts among those with suicidal ideation

**eTable 6.** Associations between lifetime psychotic experiences and subsequent onset of suicidal ideation, plans, and attempts in those with and without lifetime mental disorders

This supplementary material has been provided by the authors to give readers additional information about their work.

## **eMethods.** Supplementary methods

We included the 19 WMH surveys that administered both the Psychosis and Suicidality Modules STBs (N=33,370). These surveys are distributed across North and South America (Argentina, Colombia, Mexico, Peru, Sao Paulo in Brazil, USA); Africa (Nigeria); the Middle East (Iraq, Lebanon); Asia (Shenzhen in the People's Republic of China); the South Pacific (New Zealand); and Europe (Belgium, France, Germany, Italy, the Netherlands, Portugal, Romania, Spain). The majority of these surveys were based on multi-stage, clustered area probability household sampling designs, the exceptions being Belgium, Germany and Italy, which used municipal resident registries to select respondents (eTable 1 in the Supplement).

In order to focus on the correlates of PEs in those without psychotic disorders, we made the *a priori* decision to exclude individuals who had PEs but who also screened positive for possible schizophrenia/psychosis and manic-depression/mania. Thus, in keeping with previous studies of PEs,<sup>1-4</sup> we excluded respondents who (a) reported (1) *schizophrenia/psychosis* or (2) *manic-depression/mania* in response to the question “*What did the doctor say was causing (this/these) experiences?*”; and (b) those who ever took an antipsychotic medication for these symptoms. This resulted in the exclusion of 146 respondents (0.4% of all respondents), leaving 33,370 respondents for this study.

All WMH interviews were conducted in the homes of respondents by trained lay interviewers. Informed consent was obtained before beginning interviews in all countries. Procedures for obtaining informed consent and protecting individuals (ethical approvals) were approved and monitored for compliance by the institutional review boards of the collaborating organizations in each country. Informed consent was obtained from all participants and approval obtained from local institutional review boards (eTable 2 in the Supplement); more detailed information has been published previously.<sup>5,6</sup>

Standardized interviewer training and quality control procedures were used consistently in the surveys. Full details of these procedures are described elsewhere.<sup>7,8</sup>

Interviews were administered face to face in two parts.<sup>20</sup> Part 1, which assessed a core set of mental disorders, was administered to all respondents. Part 2, which assessed additional mental disorders, STBs, and PEs, was administered to respondents who met lifetime criteria for any Part I disorder, and a random proportion of respondents without any Part 1 disorder.

Part 2 respondents were weighted by the inverse of their probability of selection to adjust for differential sampling, and therefore provide representative data on the target adult general population. Details about sampling methods are available elsewhere.<sup>9</sup> Additional weights were used to adjust for differential probabilities of selection within households, nonresponse, and to match the samples to population socio-demographic distributions.

The WMH surveys administered the WHO Composite International Diagnostic Interview (CIDI),<sup>8</sup> a validated fully-structured diagnostic interview designed to assess the prevalence and correlates of a wide range of mental disorders according to the definitions and criteria of both DSM-IV and ICD-10. Translation, back-translation, and harmonisation protocols were used to adapt the CIDI for use in each participating country.

*Mental disorders:* The WMH version of the CIDI assessed lifetime history of 21 mental disorders broadly classified into *mood disorders*; *anxiety disorders*; *behavior disorders*; *eating disorders* and *substance use disorders* (eTable 3c in the Supplement). Full details are given in several WMH publications including two recent papers on PEs.<sup>1,10</sup> Clinical reappraisal studies indicate that lifetime diagnoses based on the CIDI have good concordance with diagnoses based on blinded clinical interviews.<sup>11</sup> In keeping with our previous research, standardised diagnostic hierarchy rules among the disorders assessed were applied where appropriate.<sup>1</sup>

1. McGrath JJ, Saha S, Al-Hamzawi A, et al. The Bidirectional Associations Between Psychotic Experiences and DSM-IV Mental Disorders. *Am J Psychiatry*. 2016;173(10):997-1006.
2. McGrath JJ, Saha S, Al-Hamzawi A, et al. Psychotic Experiences in the General Population: A Cross-National Analysis Based on 31261 Respondents From 18 Countries. *JAMA Psychiatry*. 2015;72(7):697-705.
3. McGrath JJ, Alati R, Clavarino A, et al. Age at first tobacco use and risk of subsequent psychosis-related outcomes: A birth cohort study. *Aust N Z J Psychiatry*. 2016;50(6):577-583.
4. Saha S, Scott JG, Johnston AK, et al. The association between delusional-like experiences and suicidal thoughts and behaviour. *Schizophr Res*. 2011;132(2-3):197-202.
5. Ruscio AM, Hallion LS, Lim CCW, et al. Cross-sectional Comparison of the Epidemiology of DSM-5 Generalized Anxiety Disorder Across the Globe. *JAMA Psychiatry*. 2017;74(5):465-475.
6. Pennell B, Mneimneh ZN, Bowers A, et al. Implementation of the World Mental Health Surveys. In: Kessler R, Üstün TB, eds. *The WHO World Mental Health*

- Surveys: Global Perspectives on the Epidemiology of Mental Disorder*. Cambridge, UK: Cambridge University Press; 2008:33-57.
7. Kessler RC, Haro JM, Heeringa SG, Pennell BE, Ustun TB. The World Health Organization World Mental Health Survey Initiative. *Epidemiol Psychiatr Soc*. 2006;15(3):161-166.
  8. Kessler RC, Üstün TB. The World Health Organization Composite International Diagnostic Interview. In: Kessler RC, Üstün TB, eds. *The WHO World Mental Health Surveys: Global Perspectives on the Epidemiology of Mental Disorders*. New York: Cambridge University Press; 2008:58-90.
  9. Kessler RC, Ustun TB. The World Mental Health (WMH) Survey Initiative Version of the World Health Organization (WHO) Composite International Diagnostic Interview (CIDI). *Int J Methods Psychiatr Res*. 2004;13(2):93-121.
  10. McGrath JJ, McLaughlin KA, Saha S, et al. The association between childhood adversities and subsequent first onset of psychotic experiences: a cross-national analysis of 23 998 respondents from 17 countries. *Psychol Med*. 2017;47:1230-1245.
  11. Haro JM, Arbabzadeh-Bouchez S, Brugha TS, et al. Concordance of the Composite International Diagnostic Interview Version 3.0 (CIDI 3.0) with standardized clinical assessments in the WHO World Mental Health surveys. *Int J Methods Psychiatr Res*. 2006;15(4):167-180.

**eTable 1.** World Mental Health (WMH) sample characteristics by World Bank income categories and sample for psychotic experiences (PEs)

| Country by income category                   | Survey <sup>a</sup> | Sample characteristics                                             | Field dates | Age range | Sample size  |              | Response rate <sup>b</sup> |
|----------------------------------------------|---------------------|--------------------------------------------------------------------|-------------|-----------|--------------|--------------|----------------------------|
|                                              |                     |                                                                    |             |           | Part I       | PEs sample   |                            |
| <b>Low and lower middle income countries</b> |                     |                                                                    |             |           |              |              |                            |
| Colombia                                     | NSMH                | All urban areas of the country                                     | 2003        | 18-65     | 4426         | 722          | 87.7                       |
| Iraq                                         | IMHS                | Nationally representative                                          | 2006-7      | 18-96     | 4332         | 4329         | 95.2                       |
| Nigeria                                      | NSMHW               | 21 of the 36 states in the country                                 | 2002-3      | 18-100    | 6752         | 1417         | 79.3                       |
| Peru                                         | EMSMP               | 5 urban areas (approximately 38% of the total national population) | 2004-5      | 18-65     | 3930         | 530          | 90.2                       |
| PRC <sup>c</sup> - Shenzhen <sup>d</sup>     | Shenzhen            | Shenzhen metropolitan area                                         | 2006-7      | 18-88     | 7132         | 2468         | 80.0                       |
| <b>Upper-middle income countries</b>         |                     |                                                                    |             |           |              |              |                            |
| Brazil - São Paulo                           | São Paulo Megacity  | São Paulo metropolitan area                                        | 2005-7      | 18-93     | 5037         | 2922         | 81.3                       |
| Lebanon                                      | LEBANON             | Nationally representative                                          | 2002-3      | 18-94     | 2857         | 1029         | 70.0                       |
| Mexico                                       | M-NCS               | All urban areas of the country                                     | 2001-2      | 18-65     | 5782         | 715          | 76.6                       |
| Romania                                      | RMHS                | Nationally representative                                          | 2005-6      | 18-96     | 2357         | 2357         | 70.9                       |
| <b>High-income countries</b>                 |                     |                                                                    |             |           |              |              |                            |
| Argentina                                    | AMHES               | Nationally representative                                          | 2015        | 18-98     | 3927         | 2109         | 77.3                       |
| Belgium                                      | ESEMeD              | Nationally representative                                          | 2001-2      | 18-95     | 2419         | 319          | 50.6                       |
| France                                       | ESEMeD              | Nationally representative                                          | 2001-2      | 18-97     | 2894         | 301          | 45.9                       |
| Germany                                      | ESEMeD              | Nationally representative                                          | 2002-3      | 18-95     | 3555         | 408          | 57.8                       |
| Italy                                        | ESEMeD              | Nationally representative                                          | 2001-2      | 18-100    | 4712         | 617          | 71.3                       |
| New Zealand <sup>d</sup>                     | NZMHS               | Nationally representative                                          | 2003-4      | 18-98     | 12790        | 7263         | 73.3                       |
| Portugal                                     | NMHS                | Nationally representative                                          | 2008-9      | 18-81     | 3849         | 2053         | 57.3                       |
| Spain                                        | ESEMeD              | Nationally representative                                          | 2001-2      | 18-98     | 5473         | 1159         | 78.6                       |
| The Netherlands                              | ESEMeD              | Nationally representative                                          | 2002-3      | 18-95     | 2372         | 348          | 56.4                       |
| The United States                            | NCS-R               | Nationally representative                                          | 2002-3      | 18-99     | 9282         | 2304         | 70.9                       |
| <b>All countries combined</b>                |                     |                                                                    |             |           | <b>93878</b> | <b>33370</b> | <b>72.3</b>                |

<sup>a</sup> **NSMH** (The Colombian National Study of Mental Health); **IMHS** (Iraq Mental Health Survey); **NSMHW** (The Nigerian Survey of Mental Health and Wellbeing); **EMSMP** (La Encuesta Mundial de Salud Mental en el Peru); **LEBANON** (Lebanese Evaluation of the Burden of Ailments and Needs of the Nation); **M-NCS** (The Mexico National Comorbidity Survey); **RMHS** (Romania Mental Health Survey); **AMHES** (Argentina Mental Health Epidemiologic Survey); **ESEMeD** (The European Study Of The Epidemiology Of Mental Disorders); **NZMHS** (New Zealand Mental Health Survey); **NMHS** (Portugal National Mental Health Survey); **NCS-R** (The US National Comorbidity Survey Replication).

<sup>b</sup> The response rate is calculated as the ratio of the number of households in which an interview was completed to the number of

households originally sampled, excluding from the denominator households known not to be eligible either because of being vacant at the time of initial contact or because the residents were unable to speak the designated languages of the survey. The weighted average response rate is 72.3%.

<sup>c</sup> People's Republic of China.

<sup>d</sup> For the purposes of cross-national comparisons we limit the sample to those 18+.

**eTable 2.** Ethics review and informed consent in the World Mental Health Surveys

| <b>Country</b>  | <b>Type of Organization</b>                                                | <b>IRB/Ethics approval</b>                                                                                             | <b>Type of consent obtained</b> |
|-----------------|----------------------------------------------------------------------------|------------------------------------------------------------------------------------------------------------------------|---------------------------------|
| Argentina       | Academic Centre/Institute (School of Medicine, University of Buenos Aires) | Bioethics Committee, School of Medicine, University of Buenos Aires                                                    | Written                         |
| Belgium         | Government Agency                                                          | Ethics Committee of the Institute of Public Health (Federal Public Service Health, Food Chain Safety, and Environment) | Verbal                          |
| Brazil          | Academic Center/Institute; Private For-Profit Company                      | Research and Ethics Committee of the School of Medicine, University of São Paulo                                       | Written                         |
| Colombia        | Non-Profit Organization                                                    | Ethics Committee for the FES Social Foundation                                                                         | Verbal                          |
| France          | Academic Center/Institute                                                  | Acta No. 39                                                                                                            | Written                         |
| Germany         | Academic Center/Institute                                                  | Ethics Committee of the University of Leipzig                                                                          | Verbal                          |
| Iraq            | Government Agencies; World Health Organization                             | Ethics Scientific Committee of the Ministry of Health of Iraq                                                          | Verbal                          |
| Italy           | Private For-Profit Company                                                 | Italian National Institute of Health                                                                                   | Written                         |
| Lebanon         | Non-Profit Research Institute; Non-Governmental Organization               | University of Balamand Faculty of Medicine Institutional Review Board                                                  | Verbal                          |
| Mexico          | Academic Center/Institute                                                  | Ethics Committee in Research of the National Institute of Psychiatry Ramon de la Fuente Muñiz                          | Verbal                          |
| New Zealand     | Ministry of Health                                                         | New Zealand Health Ethics Committees (approval from 14 separate committees)                                            | Written                         |
| Nigeria         | Government Agency; Academic Center/Institute                               | University of Ibadan/University College Hospital Joint Ethics Committee                                                | Verbal                          |
| Peru            | Institute of Health                                                        | National Institute of Health Peru                                                                                      | Verbal                          |
| PRC Shenzhen    | Academic Center/Institute                                                  | Ethics Committee of Shenzhen Kangning Hospital                                                                         | Verbal                          |
| Portugal        | Academic Center/Institute                                                  | Ethics Committee, Faculdade de Ciências Médicas, Universidade Nova                                                     | Verbal                          |
| Romania         | Academic Center/Institute; Public Organization                             | Ethic Commission, Scientific Board of National Institute for Research and Development in Health                        | Verbal                          |
| Spain           | Academic Center/Institute                                                  | Ethical Committees of Sant Joan de Deu Serveis de Salut Menta and of IMIM-Hospital del Mar Medical Research Institute  | Written                         |
| The Netherlands | Private For-Profit Company; Academic Center/Institute                      | Ethics Committee of the Netherlands Institute of Mental Health and Addiction                                           | Written                         |

|               |                           |                                                                                                                            |        |
|---------------|---------------------------|----------------------------------------------------------------------------------------------------------------------------|--------|
| United States | Academic Center/Institute | Human Subjects Committees of the Institute for Social Research at the University of Michigan and of Harvard Medical School | Verbal |
|---------------|---------------------------|----------------------------------------------------------------------------------------------------------------------------|--------|

Abbreviation: PRC, People's Republic of China.



**eTable 3.** Composite International Diagnostic Interview psychotic experience types in European Study of the Epidemiology of Mental Disorders sites, other sites, and DSM-IV mental disorder categories across sites

A. ESEMed sites (Belgium, France, Germany, Italy, the Netherlands, and Spain)

| <b>Item</b>                                          | <b>Type</b> | <b>Description</b>                                                                                                                                                                                                                                                                                                           |
|------------------------------------------------------|-------------|------------------------------------------------------------------------------------------------------------------------------------------------------------------------------------------------------------------------------------------------------------------------------------------------------------------------------|
| <b>A. Saw a vision<br/>(Visual hallucinations)</b>   | <b>1</b>    | Did you ever see something that wasn't really there that other people could not see? Please do not include any times when you were dreaming or half-asleep or under the influence of alcohol or drugs?                                                                                                                       |
| <b>B. Heard voices<br/>(Auditory hallucinations)</b> | <b>2</b>    | Did you ever hear things that other people said did not exist, like strange voices coming from inside your head talking to you or about you, or voices coming out of the air when there was no one around. Please do not include any times when you were dreaming or half-asleep or under the influence of alcohol or drugs? |
| <b>C. Thought insertion</b>                          | <b>3</b>    | Did you ever believe that some mysterious force was inserting many different strange thoughts -- that were definitely not your own thoughts -- directly into your head by means of x-rays or laser beams or other methods?                                                                                                   |
| <b>D. Mind control/passivity</b>                     | <b>4</b>    | Did you ever feel that your mind had been taken over by strange forces with laser beams or other methods that were making you do things you did not choose to do. Again, do not include times when you were dreaming or under the influence of alcohol or drugs?                                                             |
| <b>E. Ideas of reference</b>                         | <b>5</b>    | Did you ever believe that some strange force was trying to communicate directly with you by sending special signs or signals that you could understand but that no one else could understand. Sometimes this happens by special signs coming through the radio or television?                                                |
| <b>F. Plot to harm/follow</b>                        | <b>6</b>    | Did you ever believe that there was an unjust plot going on to harm you or to have people follow you that your family and friends did not believe existed?                                                                                                                                                                   |

ESEMeD = European Study of the Epidemiology of Mental Disorders

B. Non-ESEMed sites (People’s Republic of China, Colombia, Lebanon, Mexico, Brazil, Iraq, Nigeria, Peru, Portugal, New Zealand, Romania, United States, and Argentina)

| Item                                                   | Type      | Description                                                                                                                                                                                                                                                                   |
|--------------------------------------------------------|-----------|-------------------------------------------------------------------------------------------------------------------------------------------------------------------------------------------------------------------------------------------------------------------------------|
| <b>A. Saw a vision<br/>(Visual hallucinations)</b>     | <b>1</b>  | Did you ever see something that other people who were there could not see?                                                                                                                                                                                                    |
|                                                        | <b>1a</b> | Did this every happen when you were not dreaming, not half-asleep, and not under the influence of alcohol or drugs?                                                                                                                                                           |
| <b>B. Hearing voices<br/>(Auditory hallucinations)</b> | <b>2</b>  | Did you ever hear things that other people said did not exist, like strange voices coming from inside your head talking to you or about you, or voices coming out of the air when there was no one around?                                                                    |
|                                                        | <b>2a</b> | Did this every happen when you were not dreaming, not half-asleep, and not under the influence of alcohol or drugs?                                                                                                                                                           |
| <b>C. Thought insertion</b>                            | <b>3</b>  | Did you ever believe that some mysterious force was inserting many different strange thoughts -- that were definitely not your own thoughts – directly into your head by means of x-rays or laser beams or other methods?                                                     |
|                                                        | <b>3a</b> | Did this every happen when you were not dreaming, not half-asleep, and not under the influence of alcohol or drugs?                                                                                                                                                           |
| <b>D. Mind control/passivity</b>                       | <b>4</b>  | Did you ever feel that your mind had been taken over by strange forces with laser beams or other methods that were making you do things you did not choose to do?                                                                                                             |
|                                                        | <b>4a</b> | Did this every happen when you were not dreaming, not half-asleep, and not under the influence of alcohol or drugs?                                                                                                                                                           |
| <b>E. Ideas of reference</b>                           | <b>5</b>  | Did you ever believe that some strange force was trying to communicate directly with you by sending special signs or signals that you could understand but that no one else could understand. Sometimes this happens by special signs coming through the radio or television? |
|                                                        | <b>5a</b> | Did this every happen when you were not dreaming, not half-asleep, and not under the influence of alcohol or drugs?                                                                                                                                                           |
| <b>F. Plot to harm/follow</b>                          | <b>6</b>  | Did you ever believe that there was an unjust plot going on to harm you or to have people follow you that your family and friends did not believe existed?                                                                                                                    |
|                                                        | <b>6a</b> | Did this every happen when you were not dreaming, not half-asleep, and not under the influence of alcohol or drugs?                                                                                                                                                           |

Note: For the assessment of psychotic experiences we included items 1a, 2a, 3a, 4a, 5a, and 6a. Similarly for the assessment of hallucinatory experiences we included types 1a and 2a, and for the assessment of delusional experiences we included types 3a, 4a, 5a, and 6a.

C. 21 *DSM-IV* mental disorders across 19 WMH sites

---

|                                   |                                                                                                                                                                                                                                 |
|-----------------------------------|---------------------------------------------------------------------------------------------------------------------------------------------------------------------------------------------------------------------------------|
| <b>A. Mood disorders</b>          | Major depressive disorder<br>Bipolar disorder (Bipolar I, II, Subthreshold)                                                                                                                                                     |
| <b>B. Anxiety disorders</b>       | Panic disorder<br>Generalized anxiety disorder<br>Specific phobia<br>Social phobia<br>Agoraphobia without panic<br>Post-traumatic stress disorder<br>Separation anxiety disorder (Child)<br>Separation anxiety disorder (Adult) |
| <b>C. Behaviour disorders</b>     | Intermittent explosive disorder<br>Attention deficit disorder<br>Oppositional defiant disorder<br>Conduct disorder                                                                                                              |
| <b>D. Eating disorders</b>        | Anorexia nervosa<br>Bulimia nervosa<br>Binge eating disorder                                                                                                                                                                    |
| <b>E. Substance-use disorders</b> | Alcohol abuse<br>Alcohol dependence<br>Drug abuse<br>Drug dependence                                                                                                                                                            |

---

**eTable 4.** Lifetime prevalence of suicidal plans and attempts among those with suicidal ideation

|                                                                                    | Plans          |                |     | Planned attempts |                |     | Unplanned attempts |                |     |
|------------------------------------------------------------------------------------|----------------|----------------|-----|------------------|----------------|-----|--------------------|----------------|-----|
|                                                                                    | n <sup>a</sup> | % <sup>b</sup> | SE  | n <sup>a</sup>   | % <sup>b</sup> | SE  | n <sup>a</sup>     | % <sup>b</sup> | SE  |
| <b>STB prevalence</b>                                                              | 200            | <b>33.6</b>    | 0.9 | 114              | <b>55.5</b>    | 1.5 | 62                 | <b>17.0</b>    | 0.9 |
| (Denominator N) <sup>c</sup>                                                       | 0              | (5106)         |     | 2                | (2000)         |     | 9                  | (3106)         |     |
| <b>PE status (in those with ideation)</b>                                          |                |                |     |                  |                |     |                    |                |     |
| No PE                                                                              | 158            | <b>32.7</b>    | 0.9 | 884              | <b>53.6</b>    | 1.6 | 50                 | <b>16.6</b>    | 0.9 |
| (Denominator N) <sup>c</sup>                                                       | 3              | (4165)         |     |                  | (1583)         |     | 4                  | (2582)         |     |
| Any PE                                                                             | 417            | <b>37.9</b>    | 2.1 | 258              | <b>63.1</b>    | 3.1 | 12                 | <b>18.9</b>    | 2.2 |
| (Denominator N) <sup>c</sup>                                                       |                | (941)          |     |                  | (417)          |     | 5                  | (524)          |     |
| <b>Number of PEs (in those with ideation and PEs)</b>                              |                |                |     |                  |                |     |                    |                |     |
| Exactly 1 PE type                                                                  | 236            | <b>36.0</b>    | 2.4 | 139              | <b>59.8</b>    | 4.3 | 80                 | <b>18.6</b>    | 2.7 |
| (Denominator N) <sup>c</sup>                                                       |                | (571)          |     |                  | (236)          |     |                    | (335)          |     |
| Exactly 2 PE types                                                                 | 111            | <b>36.2</b>    | 4.0 | 65               | <b>59.5</b>    | 6.6 | 33                 | <b>20.0</b>    | 4.6 |
| (Denominator N) <sup>c</sup>                                                       |                | (247)          |     |                  | (111)          |     |                    | (136)          |     |
| 3 or more PE types                                                                 | 70             | <b>50.1</b>    | 6.6 | 54               | <b>79.0</b>    | 5.8 | 12                 | <b>17.8</b>    | 7.1 |
| (Denominator N) <sup>c</sup>                                                       |                | (123)          |     |                  | (70)           |     |                    | (53)           |     |
| <b>PE annualized frequency metric<sup>b</sup> (in those with ideation and PEs)</b> |                |                |     |                  |                |     |                    |                |     |
| ≤ 0.3 episodes/year                                                                | 183            | <b>37.3</b>    | 3.1 | 115              | <b>66.3</b>    | 4.5 | 52                 | <b>16.1</b>    | 3.2 |
| (Denominator N) <sup>c</sup>                                                       |                | (425)          |     |                  | (183)          |     |                    | (242)          |     |
| > 0.3 episodes/year                                                                | 234            | <b>38.5</b>    | 2.8 | 143              | <b>60.4</b>    | 4.4 | 73                 | <b>21.4</b>    | 3.1 |
| (Denominator N) <sup>c</sup>                                                       |                | (516)          |     |                  | (234)          |     |                    | (282)          |     |

STB, Suicidal thoughts and behaviors; PE, Psychotic experiences

<sup>a</sup>Numerators refer to the number of individuals with each suicidal outcome.

<sup>b</sup>Estimates are based on weighted data.

<sup>c</sup>Denominators refer to the number of individuals in the conditional sample among those with ideation, those with ideation with a plan and those with ideation without a plan

<sup>b</sup>Annualized PE (Frequency of PE per year)=(Frequency of PE occurrences)/((age at interview - age of onset of PE + 1))

**eTable 5.** Associations between psychotic experiences and subsequent onset of suicide plans and attempts among those with suicidal ideation

|                                                                  | Plan                                      |           |                                                       |           | Planned attempt                           |           |                                                       |           | Unplanned attempt                         |           |                                                       |           |
|------------------------------------------------------------------|-------------------------------------------|-----------|-------------------------------------------------------|-----------|-------------------------------------------|-----------|-------------------------------------------------------|-----------|-------------------------------------------|-----------|-------------------------------------------------------|-----------|
|                                                                  | Basic demographic adjustment <sup>a</sup> |           | Adjusted for antecedent mental disorders <sup>b</sup> |           | Basic demographic adjustment <sup>a</sup> |           | Adjusted for antecedent mental disorders <sup>b</sup> |           | Basic demographic adjustment <sup>a</sup> |           | Adjusted for antecedent mental disorders <sup>b</sup> |           |
|                                                                  | OR                                        | (95% CI)  | OR                                                    | (95% CI)  | OR                                        | (95% CI)  | OR                                                    | (95% CI)  | OR                                        | (95% CI)  | OR                                                    | (95% CI)  |
| <b>PE status</b>                                                 |                                           |           |                                                       |           |                                           |           |                                                       |           |                                           |           |                                                       |           |
| Any PE                                                           | <b>1.0</b>                                | (0.8-1.3) | <b>1.0</b>                                            | (0.8-1.3) | <b>1.0</b>                                | (0.7-1.5) | <b>1.0</b>                                            | (0.7-1.5) | <b>0.7</b>                                | (0.5-1.1) | <b>0.7</b>                                            | (0.4-1.1) |
| <b>Number of PEs</b>                                             |                                           |           |                                                       |           |                                           |           |                                                       |           |                                           |           |                                                       |           |
| Exactly 1 PE type                                                | <b>0.9</b>                                | (0.6-1.2) | <b>0.9</b>                                            | (0.6-1.2) | <b>0.8</b>                                | (0.5-1.3) | <b>0.8</b>                                            | (0.5-1.4) | <b>0.8</b>                                | (0.4-1.4) | <b>0.7</b>                                            | (0.4-1.3) |
| Exactly 2 PE types                                               | <b>0.9</b>                                | (0.6-1.4) | <b>1.0</b>                                            | (0.7-1.4) | <b>1.0</b>                                | (0.5-2.0) | <b>1.0</b>                                            | (0.5-2.0) | <b>0.8</b>                                | (0.4-1.6) | <b>0.7</b>                                            | (0.3-1.7) |
| 3 or more PE types                                               | <b>1.8</b>                                | (1.0-3.3) | <b>1.6</b>                                            | (0.8-3.2) | <b>1.8</b>                                | (0.8-4.3) | <b>1.9</b>                                            | (0.8-4.5) | <b>0.5</b>                                | (0.2-1.4) | <b>0.5</b>                                            | (0.2-1.3) |
| <b>Joint significance of the 3 number-of-PE type measures</b>    | $\chi^2_3 = 4.5, P = 0.214$               |           | $\chi^2_3 = 3.0, P = 0.397$                           |           | $\chi^2_3 = 2.9, P = 0.409$               |           | $\chi^2_3 = 3.0, P = 0.385$                           |           | $\chi^2_3 = 2.7, P = 0.448$               |           | $\chi^2_3 = 3.3, P = 0.346$                           |           |
| <b>Difference in the ORs of the 3 number-of-PE type measures</b> | $\chi^2_2 = 4.5, P = 0.106$               |           | $\chi^2_2 = 2.9, P = 0.230$                           |           | $\chi^2_2 = 2.9, P = 0.236$               |           | $\chi^2_2 = 3.0, P = 0.221$                           |           | $\chi^2_2 = 0.4, P = 0.808$               |           | $\chi^2_2 = 0.6, P = 0.754$                           |           |
| <b>Test for linear trend</b>                                     | $\chi^2_1 = 4.1^*, P = 0.043$             |           | $\chi^2_1 = 3.3, P = 0.069$                           |           | $\chi^2_1 = 3.4, P = 0.064$               |           | $\chi^2_1 = 5.0^*, P = 0.025$                         |           | $\chi^2_1 = 1.0, P = 0.326$               |           | $\chi^2_1 = 0.0, P = 0.868$                           |           |
| <b>PE frequency metric</b>                                       |                                           |           |                                                       |           |                                           |           |                                                       |           |                                           |           |                                                       |           |
| > 0.3 episodes/year                                              | <b>1.1</b>                                | (0.8-1.5) | <b>1.1</b>                                            | (0.8-1.5) | <b>0.7</b>                                | (0.5-1.2) | <b>0.7</b>                                            | (0.4-1.2) | <b>0.9</b>                                | (0.5-1.6) | <b>0.8</b>                                            | (0.4-1.5) |

PE, Psychotic experience; STB, Suicidal thoughts and behaviors; OR, Odds ratio; CI, Confidence interval

\*Significant at the .05 level, 2-sided test

<sup>a</sup>PE (any PE, number of PE type, and PE frequency metric) was used as a predictor of STB outcomes in separate discrete-time survival models. These models control for age-cohorts, sex, person-year dummies and country.

<sup>b</sup>These models additionally control for 21 other temporally-ordered mental disorders.

**eTable 6.** Associations between lifetime psychotic experiences and subsequent onset of suicide ideation, plans, and attempts in those with and without lifetime mental disorders

|                                                                  | Ideation                          |            |                                      |            | Plan                              |            |                                      |             | Attempt                           |            |                                      |             |
|------------------------------------------------------------------|-----------------------------------|------------|--------------------------------------|------------|-----------------------------------|------------|--------------------------------------|-------------|-----------------------------------|------------|--------------------------------------|-------------|
|                                                                  | With mental disorder <sup>a</sup> |            | Without mental disorder <sup>b</sup> |            | With mental disorder <sup>a</sup> |            | Without mental disorder <sup>b</sup> |             | With mental disorder <sup>a</sup> |            | Without mental disorder <sup>b</sup> |             |
|                                                                  | OR                                | (95% C.I.) | OR                                   | (95% C.I.) | OR                                | (95% C.I.) | OR                                   | (95% C.I.)  | OR                                | (95% C.I.) | OR                                   | (95% C.I.)  |
| <b>PE status</b>                                                 |                                   |            |                                      |            |                                   |            |                                      |             |                                   |            |                                      |             |
| Any PE                                                           | 2.1*                              | (1.8-2.5)  | 3.5*                                 | (2.3-5.3)  | 2.2*                              | (1.8-2.8)  | 4.6*                                 | (2.4-8.8)   | 2.1*                              | (1.6-2.7)  | 4.1*                                 | (1.7-10.0)  |
| <b>Number of PEs</b>                                             |                                   |            |                                      |            |                                   |            |                                      |             |                                   |            |                                      |             |
| Exactly 1 PE type                                                | 1.7*                              | (1.4-2.1)  | 3.3*                                 | (2.0-5.3)  | 1.8*                              | (1.4-2.4)  | 3.2*                                 | (1.6-6.3)   | 1.6*                              | (1.2-2.2)  | 3.0                                  | (0.9-10.0)  |
| Exactly 2 PE types                                               | 2.5*                              | (1.9-3.4)  | 3.5*                                 | (1.7-7.5)  | 2.3*                              | (1.6-3.3)  | 4.5*                                 | (1.0-20.1)  | 2.2*                              | (1.4-3.5)  | 3.4                                  | (0.9-12.3)  |
| 3 or more PE types                                               | 4.2*                              | (3.0-6.0)  | 8.1*                                 | (1.8-36.8) | 5.1*                              | (3.3-8.0)  | 33.8*                                | (7.9-145.2) | 5.2*                              | (3.2-8.5)  | 29.3*                                | (5.6-153.9) |
| <b>Joint significance of the 3 number-of-PE type measures</b>    | $X^2_3 = 126.5^*$ ,<br>P < .001   |            | $X^2_3 = 37.1^*$ ,<br>P < .001       |            | $X^2_3 = 83.3^*$ ,<br>P < .001    |            | $X^2_3 = 34.4^*$ ,<br>P < .001       |             | $X^2_3 = 61.0^*$ ,<br>P < .001    |            | $X^2_3 = 20.8^*$ ,<br>P < .001       |             |
| <b>Difference in the ORs of the 3 number-of-PE type measures</b> | $X^2_2 = 20.5^*$ ,<br>P = 0.001   |            | $X^2_2 = 1.3$ ,<br>P = 0.519         |            | $X^2_2 = 15.6^*$ ,<br>P = 0.001   |            | $X^2_2 = 9.0^*$ ,<br>P = 0.011       |             | $X^2_2 = 16.5^*$ ,<br>P < .001    |            | $X^2_2 = 5.7$ ,<br>P = 0.058         |             |
| <b>Test for linear trend</b>                                     | $X^2_1 = 15.6^*$ ,<br>P = 0.001   |            | $X^2_1 = 0.9$ ,<br>P = 0.349         |            | $X^2_1 = 9.1^*$ ,<br>P = 0.003    |            | $X^2_1 = 7.4^*$ ,<br>P = 0.006       |             | $X^2_1 = 13.2^*$ ,<br>P < .001    |            | $X^2_1 = 6.6^*$ ,<br>P = 0.010       |             |
| <b>PE frequency metric</b>                                       |                                   |            |                                      |            |                                   |            |                                      |             |                                   |            |                                      |             |
| > 0.3 episodes                                                   | 2.4*                              | (1.9-3.0)  | 4.0*                                 | (2.4-6.5)  | 2.3*                              | (1.7-3.1)  | 8.3*                                 | (4.0-17.0)  | 2.1*                              | (1.5-2.8)  | 3.2*                                 | (1.2-8.0)   |

OR, Odds ratio; CI, Confidence interval

<sup>a</sup>PE (any PE, number of PE type, and PE frequency metric) was used as a predictor of STB outcomes in separate discrete-time survival models in those with any lifetime mental disorder. These models control for age-cohorts, gender, person-year dummies and country.

<sup>b</sup>PE (any PE, number of PE type, and PE frequency metric) was used as a predictor of STB outcomes in separate discrete-time survival models in those without any lifetime mental disorder. These models also control for age-cohorts, gender, person-year dummies and country.
